# Supplementary material
Source: PubMed Central journal article supplement (PMC8429451)
Supplement: 41423_2021_728_MOESM1_ESM.pdf [file 41423_2021_728_MOESM1_ESM.pdf]

# Figure S1

## A

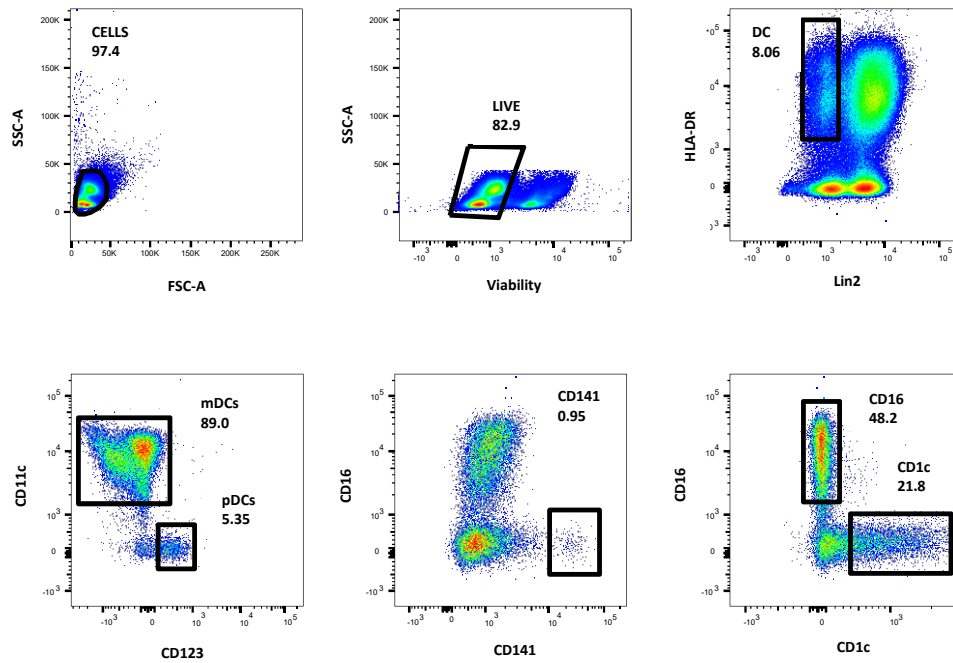

## B

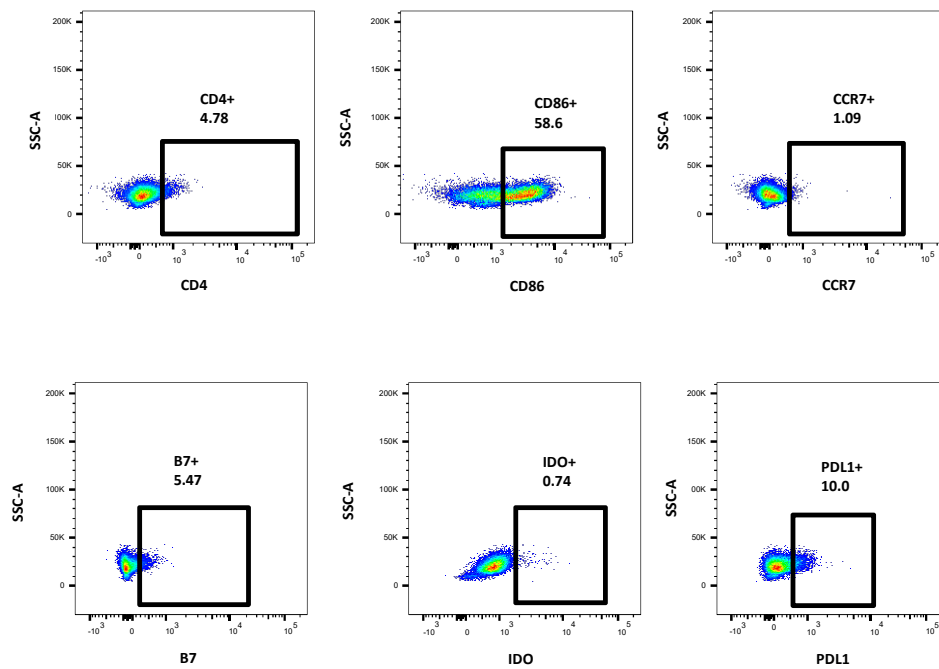

Figure S2

A

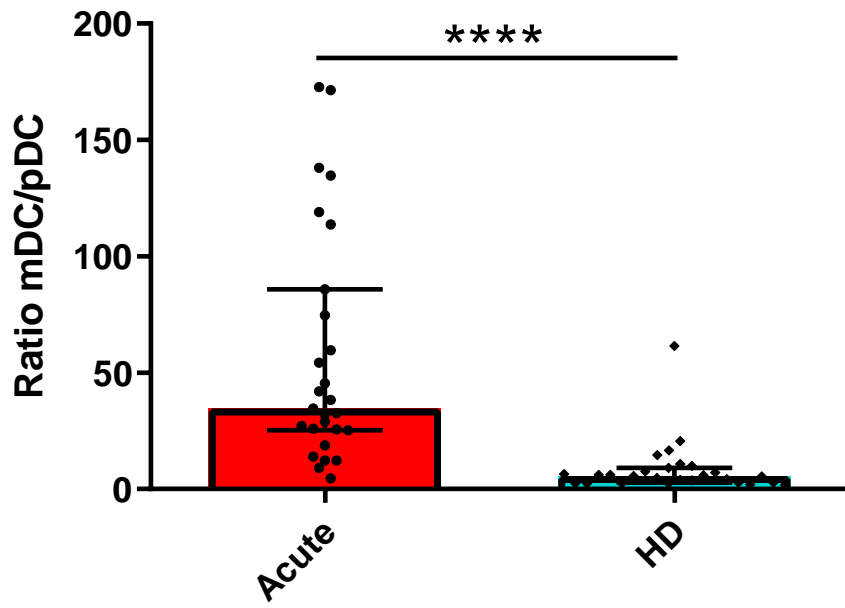

B

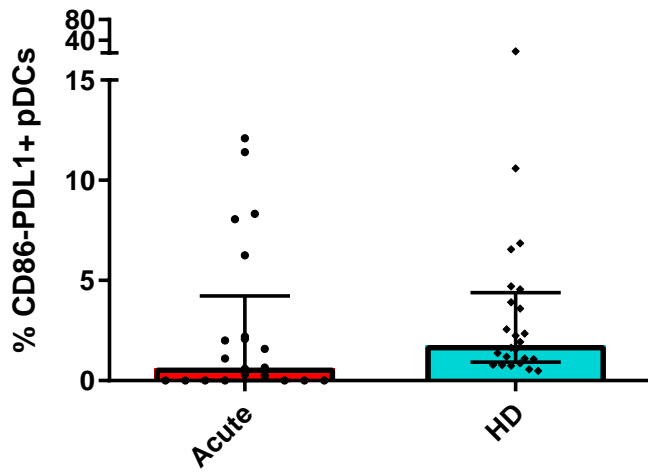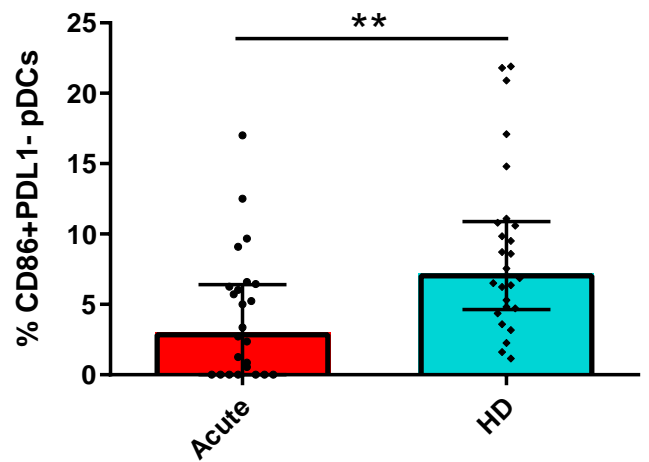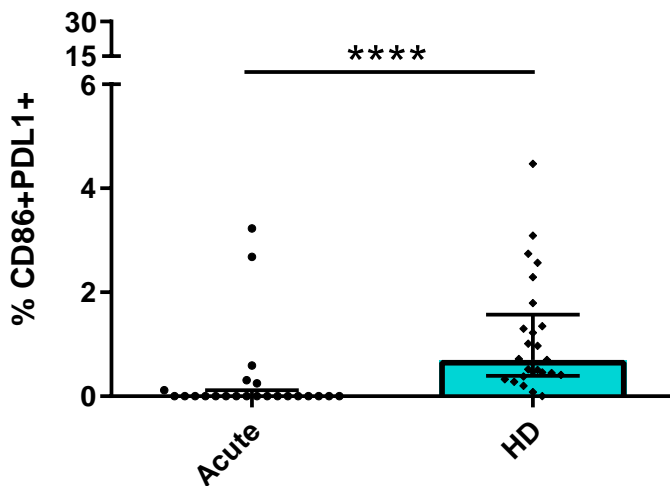

Figure S3

A

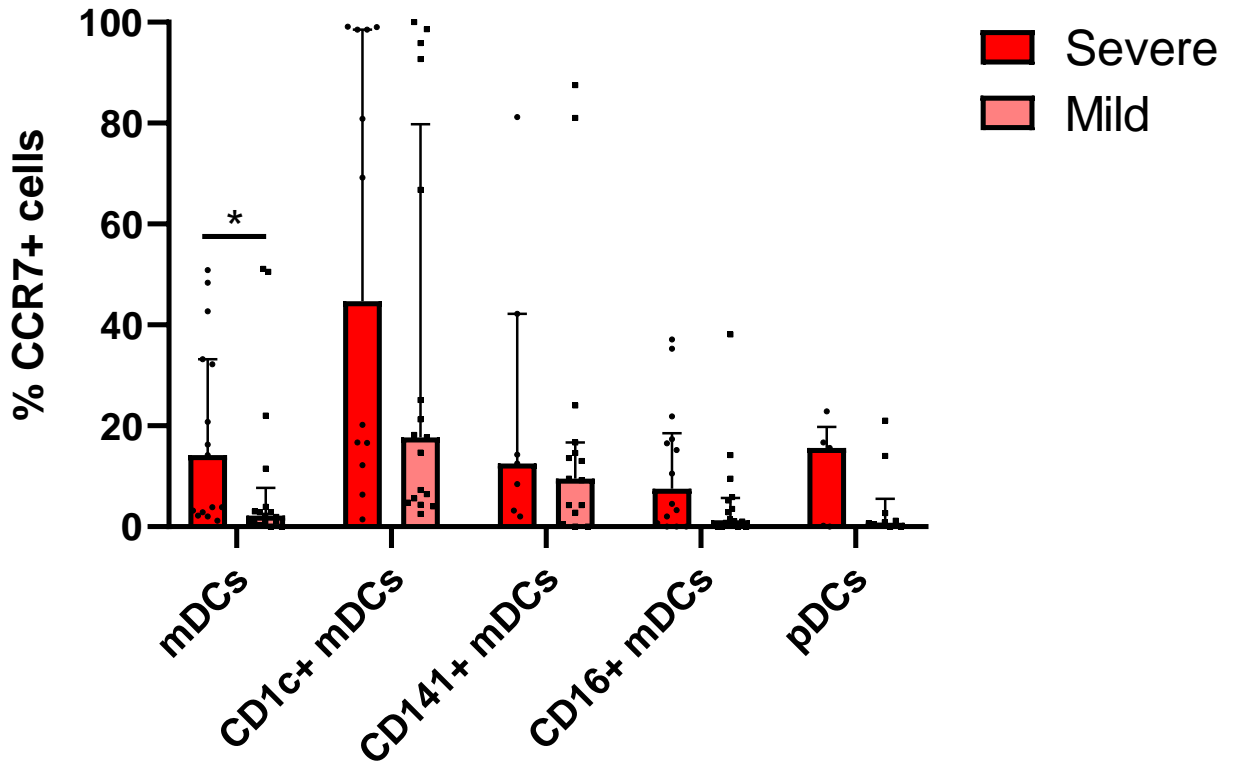

B

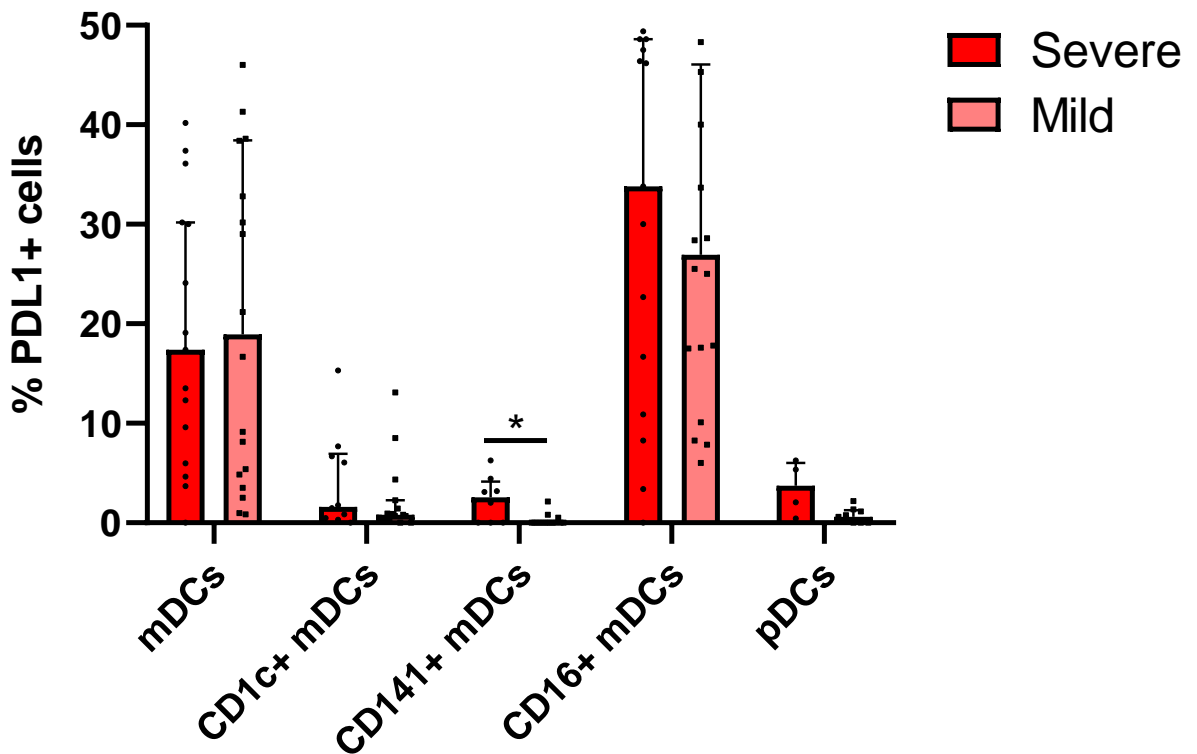

# Figure S4

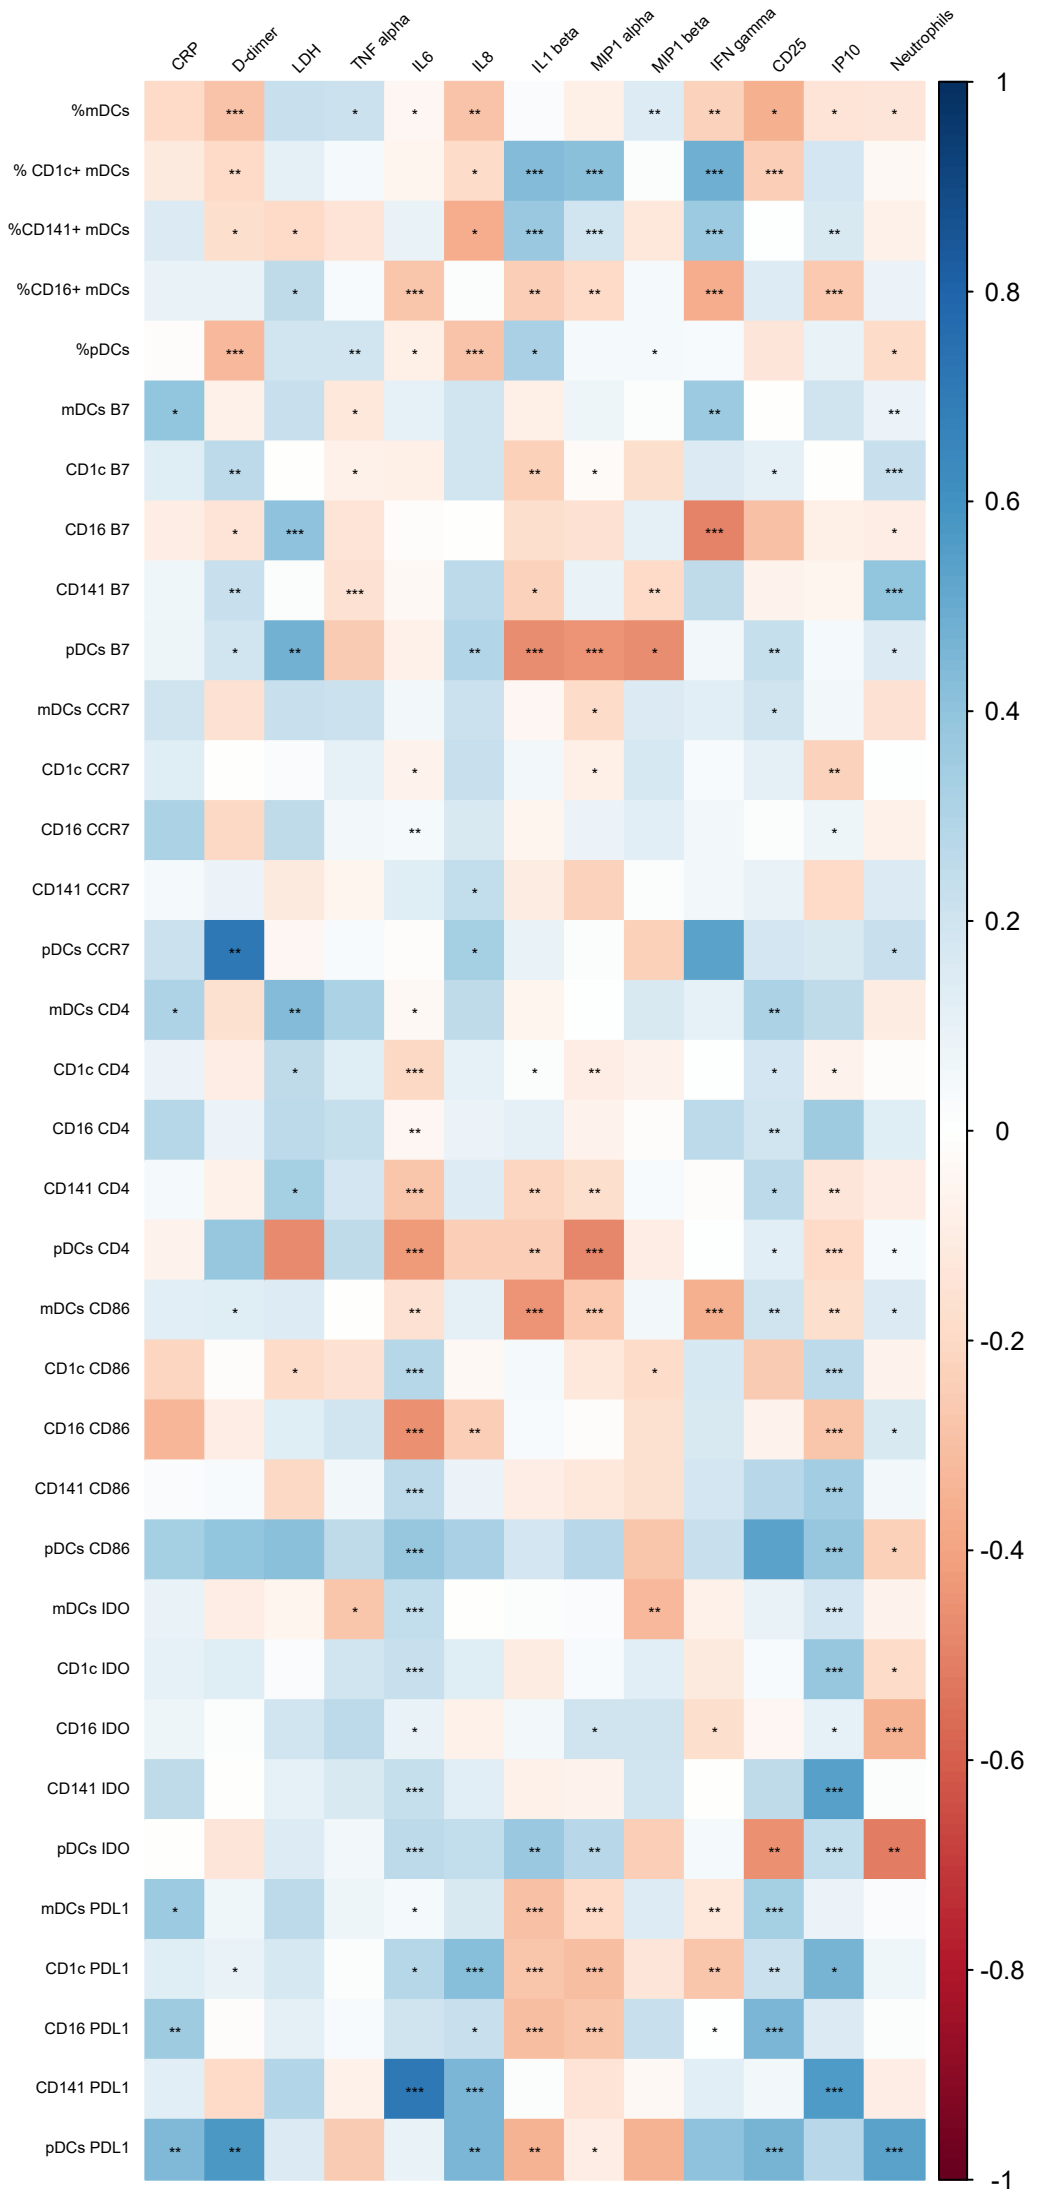

# Figure S5

## A

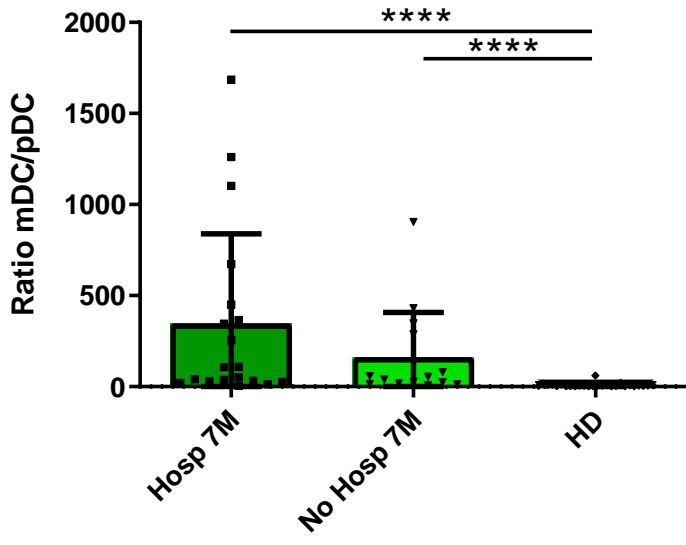

## B

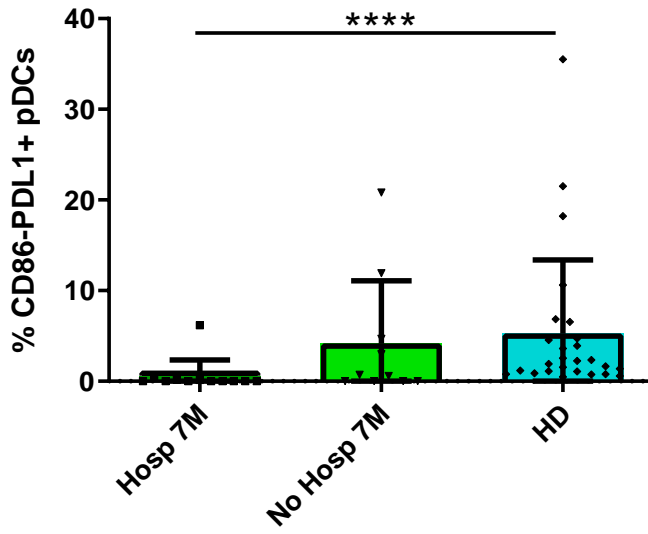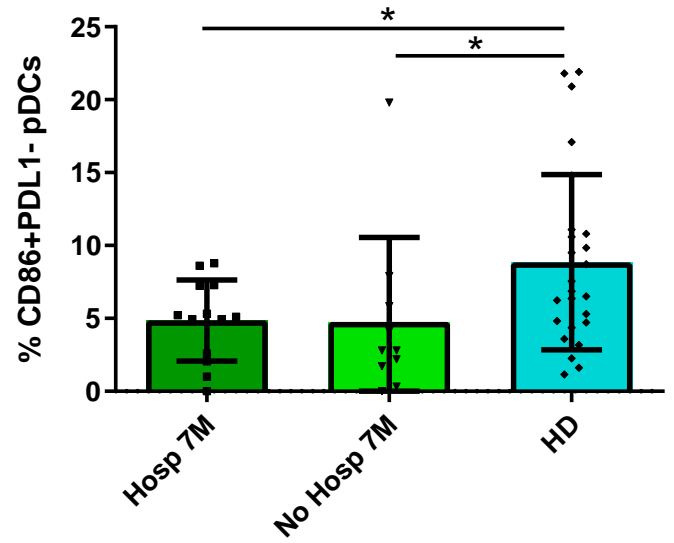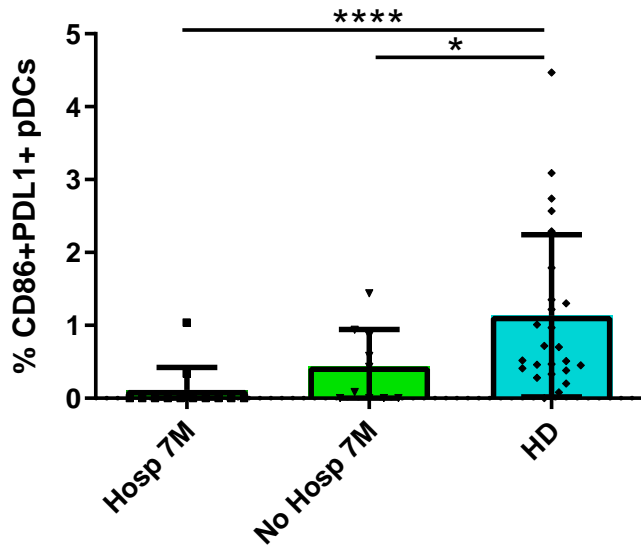

**Figure S6**

**A**

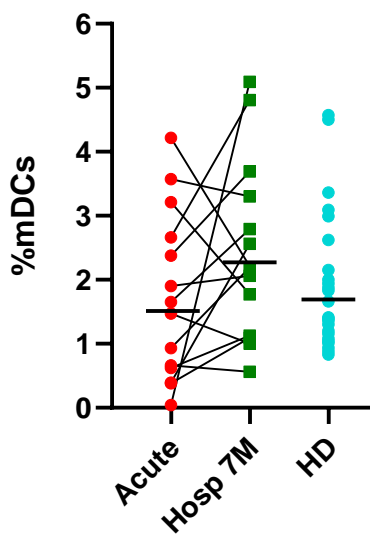

**B**

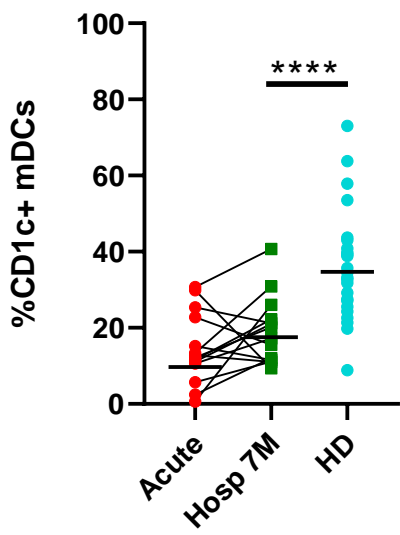

**C**

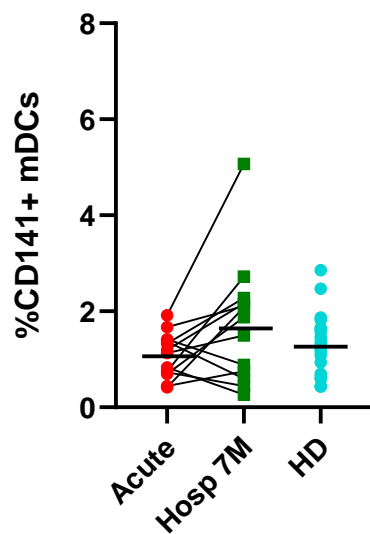

**D**

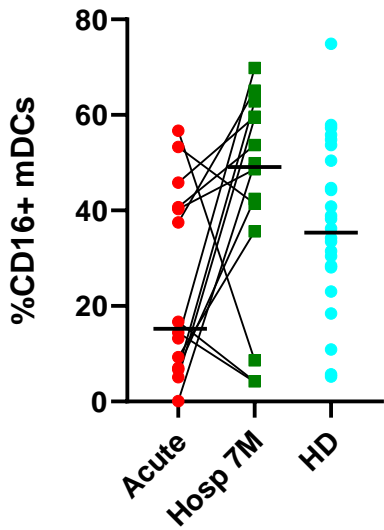

**E**

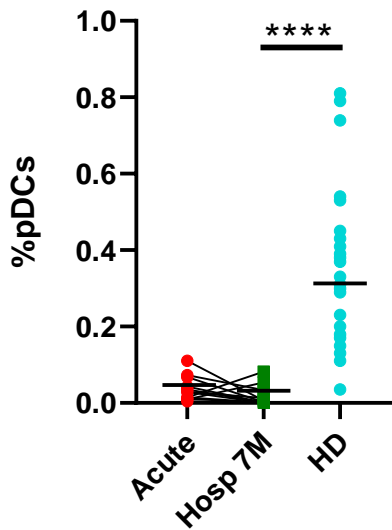

## **SUPPLEMENTAL INFORMATION**

### **Figure S1. Gating strategy for the identification of DC subpopulations and activation markers**

Pseudocolor dot plots showing the gating strategy used for the identification of studied populations in a representative SARS-CoV-2 infected patient. (A) Mononuclear cells were selected according to their size (FSC-A) and complexity (SSC-A) and dead cells were discarded using a viability marker. DC and subpopulations were identified as follows: total DCs (Lin2- HLA-DR+), total mDCs (CD11c+ CD123-), pDCs (CD11c- CD123+), and within mDCs: CD1c+, CD141+ and CD16+. (B) Representative data of total mDCs showing selected gates to analyze the percentages of CD4+, CD86+, CCR7+,  $\beta$ 7+, IDO+ and PD-L1+ cells.

### **Figure S2. mDC/pDC ratio and the percentages of pDC subsets in acute SARS-CoV-2 infected patients and healthy donors**

Bar graphs representing (A) the ratio mDC/pDC and (B) the percentages of P1-pDC (CD86-PD-L1+), P2-pDC (CD86+PD-L1+) and P3-pDC (CD86+PD-L1-) subsets in acute SARS-CoV-2 infected patients (acute) and healthy donors (HD). The median with the interquartile range is shown and each dot represents one individual. \*\*\*\* $p < 0.0001$ , \*\* $p < 0.01$ . Mann-Whitney U test was used for groups' comparisons.

**Figure S3. DC markers expression in SARS-CoV-2 infected patients with severe and mild symptoms.**

Bar graphs representing the percentage of DCs expressing CCR7 (A) and PD-L1 (B) in acute severe and mild SARS-CoV-2 infected patients. The median with the interquartile range is shown and each dot represents an individual. \* $p < 0.05$ . Mann-Whitney U test was used for groups' comparisons.

**Figure S4. Associations of DC numbers and activation markers with inflammatory markers in acute SARS-CoV-2 infected patients**

Heatmap graphs representing correlations between the percentages of DC subpopulations and the percentages of DCs expressing activation and homing markers with inflammatory markers including CRP, D-dimer, LDH, TNF- $\alpha$ , IL-6, IL-8, IL1- $\beta$ , MIP1- $\alpha$ , MIP1- $\beta$ , IFN- $\gamma$ , sCD25, IP-10 and neutrophil numbers, in acute SARS-CoV-2 infected patients. Blue color represents positive correlations and red color shows negative correlations. The intensity of the color indicates the R coefficient. \* $p < 0.05$ , \*\* $p < 0.01$ , \*\*\* $p < 0.001$ . Spearman test was used for non-parametric correlations.

**Figure S5. mDC/pDC ratio and the percentages of pDC subsets seven months after SARS-CoV-2 infection**

Bar graphs representing (A) the ratio mDC/pDC and (B) the percentages of P1-pDC (CD86-PD-L1+), P2-pDC (CD86+PD-L1+) and P3-pDC (CD86+PD-L1-) subsets in previously hospitalized (Hosp 7M) or previously non-hospitalized (No



Hosp 7M) patients seven months after SARS-CoV-2 infection and in healthy donors (HD). The median with the interquartile range is shown and each dot represents an individual. \*\*\*\* $p < 0.0001$ , \* $p < 0.05$ . Mann-Whitney U test was used for groups' comparisons.

**Figure S6. Paired analysis of DC subsets of SARS-CoV-2 infected patients in acute phase and seven months after the infection**

Before and after graphs representing the paired analysis of the percentage of total mDCs, CD1c+, CD141+ and CD16 mDCs and pDCs (A - E) in patients in acute phase (Acute) and seven months after SARS-CoV-2 infection (Hosp 7M) and in healthy donors (HD). The median is shown and each dot represents an individual. \*\*\*\* $p < 0.0001$ . Wilcoxon test was used for paired samples and Mann-Whitney U test was used for groups' comparisons.

Supplementary table 1. Characteristics of the study patients.

|                                             | Acute Infection |                |                   | Discharged<br>(6-8 months after diagnosis) |                                   |                                       | Healthy Donors<br>(n=27) |
|---------------------------------------------|-----------------|----------------|-------------------|--------------------------------------------|-----------------------------------|---------------------------------------|--------------------------|
|                                             | All<br>(n=33)   | Mild<br>(n=17) | Severe*<br>(n=16) | All<br>(38)                                | Previously Hospitalized<br>(n=21) | Previously Non Hospitalized<br>(n=17) |                          |
| Age (years)                                 | 66 [59-77]      | 62 [57-78]     | 69 [63 – 73]      | 67 [60 – 72]                               | 68 [63 – 73]                      | 65 [58 – 71]                          | 62 [39 – 84]             |
| Sex (Female sex), n (%)                     | 12 (36)         | 7 (41)         | 5 (31)            | 17 (48)                                    | 7 (33)                            | 10 (59)                               | 11 (41)                  |
| Oxygen Saturation (SatO <sub>2</sub> ), (%) | 95 [91 – 98]    | 96 [95 – 99]   | 92 [90 – 95]      | N/A                                        | N/A                               | N/A                                   | N/A                      |
| Time since hospitalization, (days)          | 3 [2 – 23]      | 2 [1 – 3]      | 20 [3 – 31]       | 201 [181 – 221]                            | 183 [168 – 197]                   | 221 [219 – 228]                       | N/A                      |
| Time since symptoms onset, (days)           | 14 [9 – 31]     | 11 [5 – 14]    | 31 [19 – 38]      | 208 [189 – 230]                            | 192 [179 – 203]                   | 230 [224 – 235]                       | N/A                      |
| Time hospitalized, (days)                   | 16 [7 – 34]     | 7 [5 – 10]     | 28 [20 – 43]      | N/A                                        | 16 [8 – 40]                       | 0                                     | N/A                      |
| Comorbidities, n (%)                        | 26 (79)         | 13 (77)        | 13 (81)           | 19 (50)                                    | 16 (76)                           | 3 (18)                                | N/A                      |
| Diabetes mellitus                           | 8 (24)          | 4 (24)         | 4 (25)            | 6 (16)                                     | 5 (24)                            | 1 (6)                                 | N/A                      |
| Hypertension                                | 19 (57)         | 8 (47)         | 11 (70)           | 15 (40)                                    | 13 (62)                           | 2 (12)                                | N/A                      |
| Cardiovascular disease                      | 7 (21)          | 4 (24)         | 3 (19)            | 8 (21)                                     | 6 (29)                            | 2 (12)                                | N/A                      |
| Obstructive pulmonary disease               | 5 (15)          | 3 (18)         | 2 (13)            | 4 (11)                                     | 4 (19)                            | 0                                     | N/A                      |
| Malignancy                                  | 2 (6)           | 1 (6)          | 1 (6)             | 2 (5)                                      | 2 (10)                            | 0                                     | N/A                      |
| Symptoms at admission (%)                   |                 |                |                   |                                            |                                   |                                       |                          |
| Cough                                       | 20 (61)         | 10 (59)        | 10 (63)           | 29 (76)                                    | 19 (91)                           | 10 (59)                               | N/A                      |
| Fever                                       | 22 (67)         | 10 (59)        | 12 (75)           | 28 (74)                                    | 16 (76)                           | 12 (71)                               | N/A                      |
| Dyspnea                                     | 14 (43)         | 7 (41)         | 7 (44)            | 21 (55)                                    | 15 (71)                           | 6 (35)                                | N/A                      |
| Anosmia                                     | 6 (18)          | 3 (18)         | 3 (19)            | 4 (11)                                     | 4 (19)                            | 0                                     | N/A                      |
| Diarrhoea                                   | 7 (21)          | 4 (24)         | 3 (19)            | 12 (32)                                    | 9 (43)                            | 3 (18)                                | N/A                      |
| Muscle pain                                 | 6 (18)          | 2 (12)         | 4 (25)            | 4 (11)                                     | 3 (14)                            | 1 (6)                                 | N/A                      |
| Treatment during hospitalization; n (%)     |                 |                |                   |                                            |                                   |                                       |                          |
| Hydroxychloroquine                          | 28 (85)         | 13 (77)        | 15 (94)           | N/A                                        | 20 (95)                           | N/A                                   | N/A                      |
| Lopinavir/Ritonavir                         | 20 (61)         | 7 (41)         | 13 (81)           | N/A                                        | 15 (71)                           | N/A                                   | N/A                      |
| Beta Interferon                             | 10 (30)         | 1 (6)          | 9 (56)            | N/A                                        | 9 (43)                            | N/A                                   | N/A                      |
| Corticoids                                  | 16 (49)         | 4 (24)         | 12 (75)           | N/A                                        | 8 (38)                            | N/A                                   | N/A                      |
| Remdesivir                                  | 3 (9)           | 3 (18)         | 0                 | N/A                                        | 0                                 | N/A                                   | N/A                      |

|             |        |   |        |     |        |     |     |
|-------------|--------|---|--------|-----|--------|-----|-----|
| Tocilizumab | 9 (27) | 0 | 9 (56) | N/A | 7 (33) | N/A | N/A |
|-------------|--------|---|--------|-----|--------|-----|-----|

<sup>a</sup>Categorical variables are expressed as number and percentages (%), and continuous variables are expressed as median (interquartile ranges [IQR]). N/A, not applicable. The different groups (acute infection, discharged patients and healthy donors) were age and sex matched. Chi-square test and a Mann-Whitney U test were used to compare categorical and continuous variables, respectively. Analysis by age; acute infection vs HD (p=0.259); discharged patients vs HD (p=0.440); Previously Hospitalized patients vs HD (p=0.488); Previously Non Hospitalized patients vs HD (p=0.604). Analysis by sex; acute infection vs HD (p=0.793); discharged patients vs HD (p=0.803); Previously Hospitalized patients vs HD (p=0.765); Previously Non Hospitalized patients vs HD (p=0.354).

\*Participants were divided in Mild or Severe, based on the highest grade of disease severity during course of hospitalization. Severe participants were those who required Intensive Care Unit admission, or having  $\geq 6$  points in the ordinal scale score based on Beigel et al. (Beigel New Engl J Med 2020) or death.
